# Supplementary material
Source: PubMed Central journal article supplement (PMC6933291)
Supplement: bloodBLD2019001385-suppl1.pdf [file bloodBLD2019001385-suppl1.pdf]

1 **SUPPLEMENTARY INFORMATION**

2 **Results**

3 **Supplemental Figure 1. Patient-derived mononuclear cell colony assays.** Equal numbers of mononuclear  
 4 cells derived from two healthy controls (samples 14-253 and 14-301) and our patient with JAK2<sup>ex13InDel</sup> were  
 5 plated in methylcellulose-based medium containing cytokines. Colonies were typed and counted after 10 days.

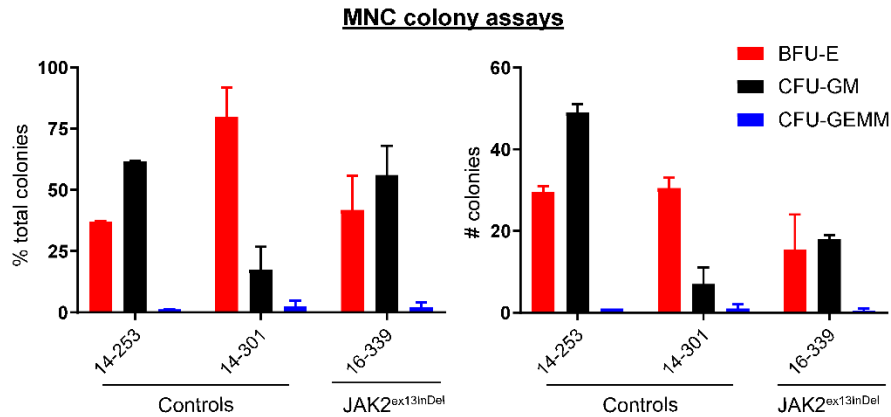

6

7

8

9 **Supplemental Figure 2. Ba/F3 colony assays.** Ba/F3 parental and mutant cells were plated in  
 10 methylcellulose-based colony-forming assays +/- IL-3 supplementation. Colonies were counted at one week  
 11 and normalized to initial cells plated.

12

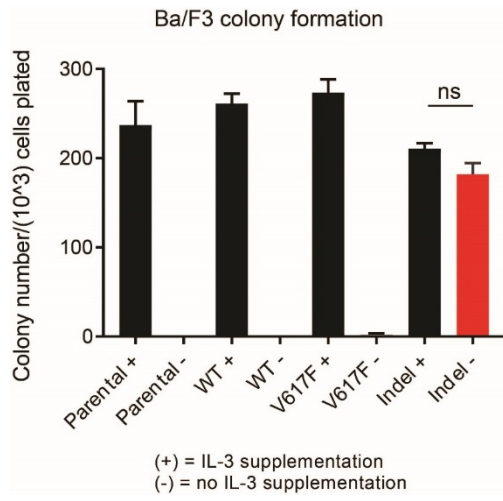

13

14

**Supplemental Figure 3. JAK2<sup>ex13InDel</sup> cell proliferation studies ± IL-3.** JAK2<sup>ex13InDel</sup> Ba/F3 cells were seeded at 2000 cells/well in 96-well plates in the presence of graded concentrations of ruxolitinib in medium with or without IL-3 supplementation. Cell proliferation was measured at 72 hours (n=3). The IC<sub>50</sub>s of ruxolitinib in the presence of IL-3 and absence of IL-3 were 1.41 μM and 0.42 μM, respectively.

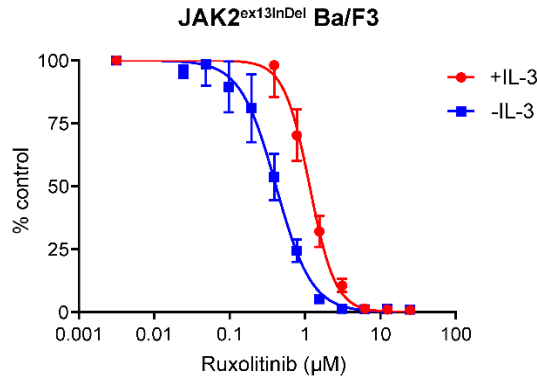

**Supplemental Figure 4. STAT5 luciferase activity with components of the IL-5 receptor.** Luciferase-based STAT5 transcriptional activity was measured ± IL-5 in the presence or absence of various components of the IL-5 receptor (no receptor components, βc chain + α chain, βc alone, or α chain alone). Only statistics for the βc alone are shown. Data were analyzed with a two-way ANOVA and Tukey's correction for multiple comparisons (\*\*\*\*p<0.0001).

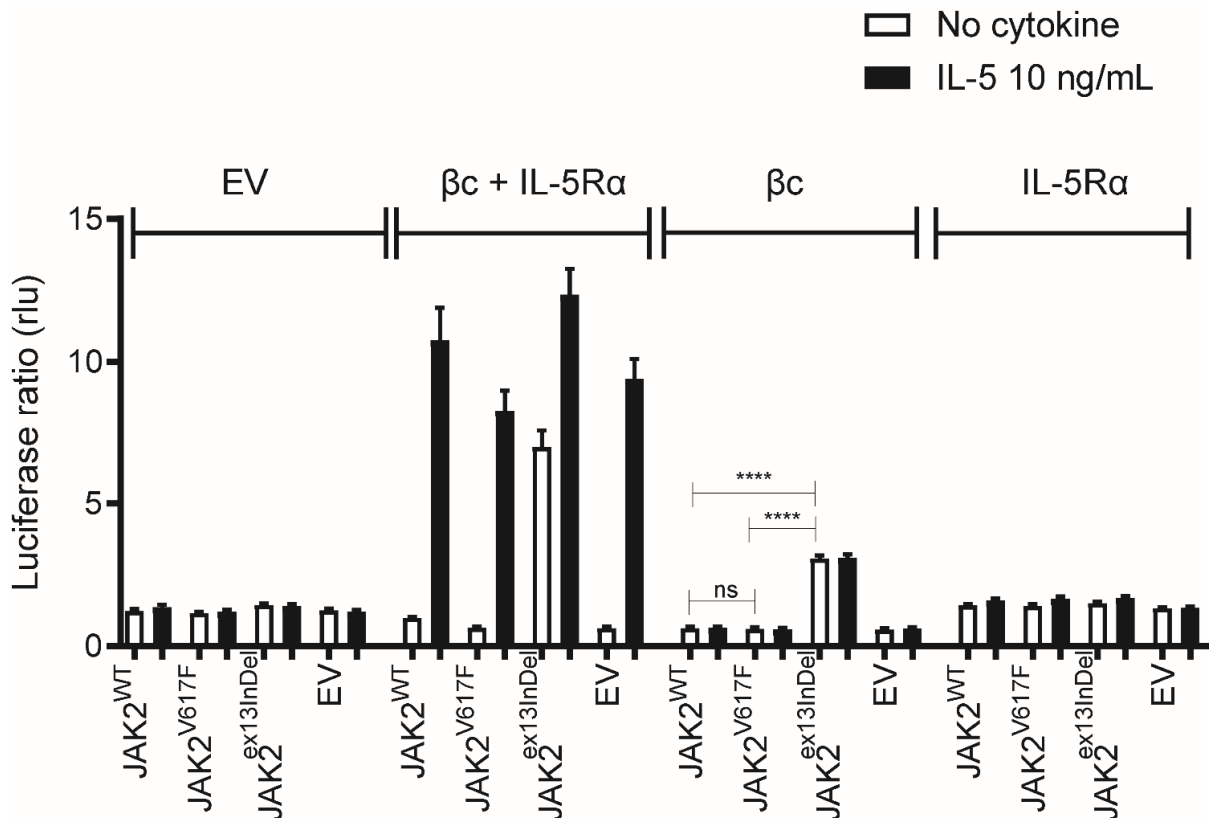

**Supplemental Figure 5. Luciferase-based STAT5 transcriptional assays in HEK293 cells using homodimeric type I cytokine receptors.** HEK293 cells were transfected with either EPOR or TPOR with a luciferase-based STAT5 reporter (Spi\_Luc), and JAK2<sup>WT</sup>, JAK2<sup>V617F</sup> or JAK2<sup>ex13InDel</sup>. STAT5 transcriptional activity was measured in the presence or absence of the respective cytokines at 10U/mL (EPO) or 10 ng/mL (TPO) (n=3 for each receptor). Data were analyzed with a two-way ANOVA and Tukey's correction for multiple comparisons (\*p<0.05, \*\*\*\*p<0.0001).

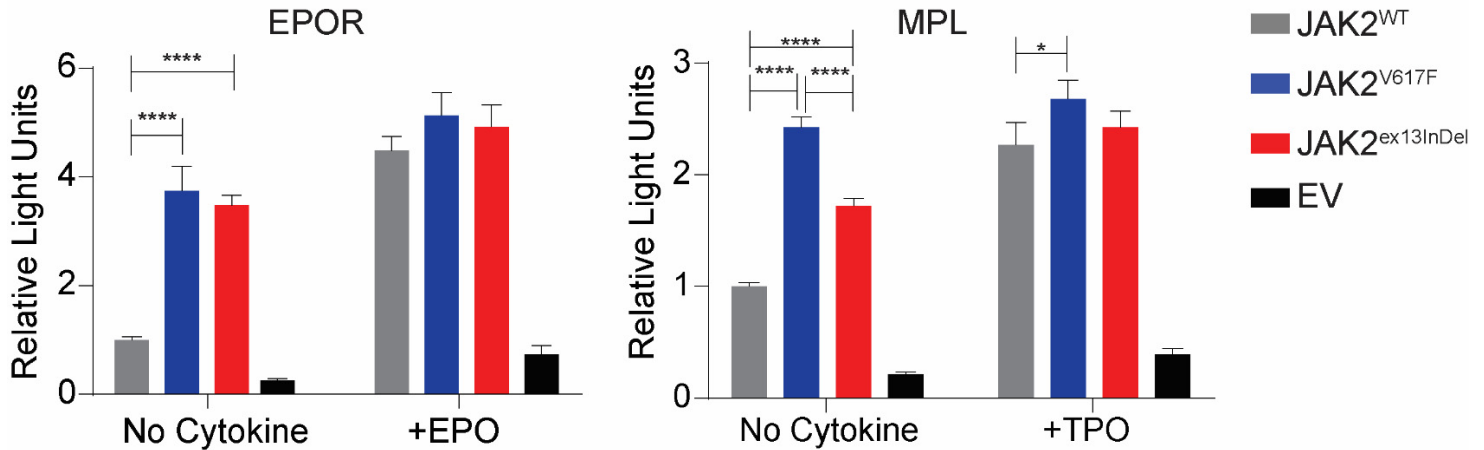

**Supplemental Figure 6. Additional JAK2 and β-common co-immunoprecipitation experiments in Ba/F3 cell lines.** Parental Ba/F3 and JAK2-mutant cells were cultured ± IL-3. Immunoprecipitation was performed on lysates with a β-common antibody and eluted samples were subjected to immunoblot analysis.

**Repeat 1:**

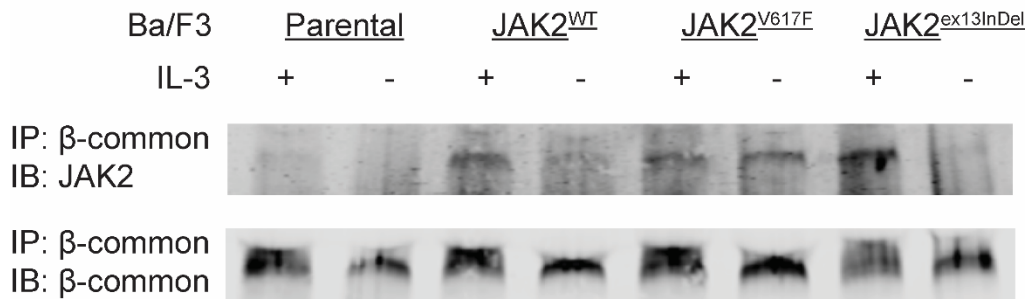

**Repeat 2:**

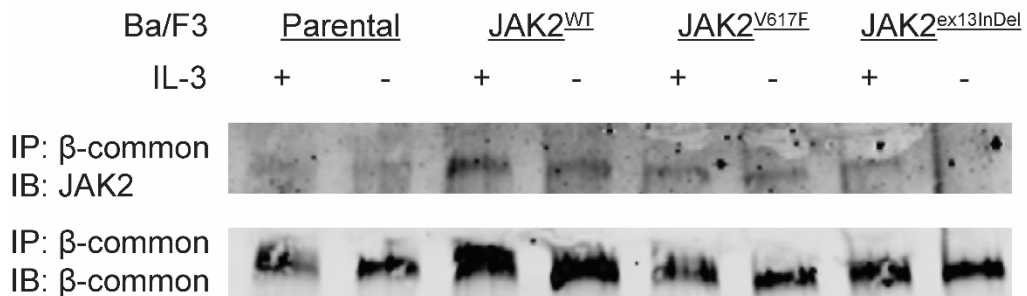

39 **Supplemental Figure 7. Cord blood eosinophil differentiation studies.** CD34<sup>+</sup> cells were purified from human  
 40 umbilical cord blood from two donors and either cultured directly or transduced with JAK2<sup>ex13InDel</sup> or  
 41 JAK2<sup>Y114A+ex13InDel</sup> (Y114A mutation is known to inhibit receptor box 1/2 motif binding). Cells were cultured for 21  
 42 days with IL-3 or IL-3 and IL-5 then analyzed by flow cytometry for eosinophil markers CD125, CD193, and  
 43 Siglec-8. Gates were drawn on FSC high, singlets that were negative for 7-AAD. Gates were set with samples  
 44 containing no fluorophores, only 7-AAD, and fluorescence minus one controls for PE, BV125, and APC. Note  
 45 that no or very few GFP<sup>+</sup> cells were observed (not shown) and that the plots reflect the bulk cultures, which  
 46 showed evidence for acquisition of eosinophilic differentiation markers, particularly Siglec-8.

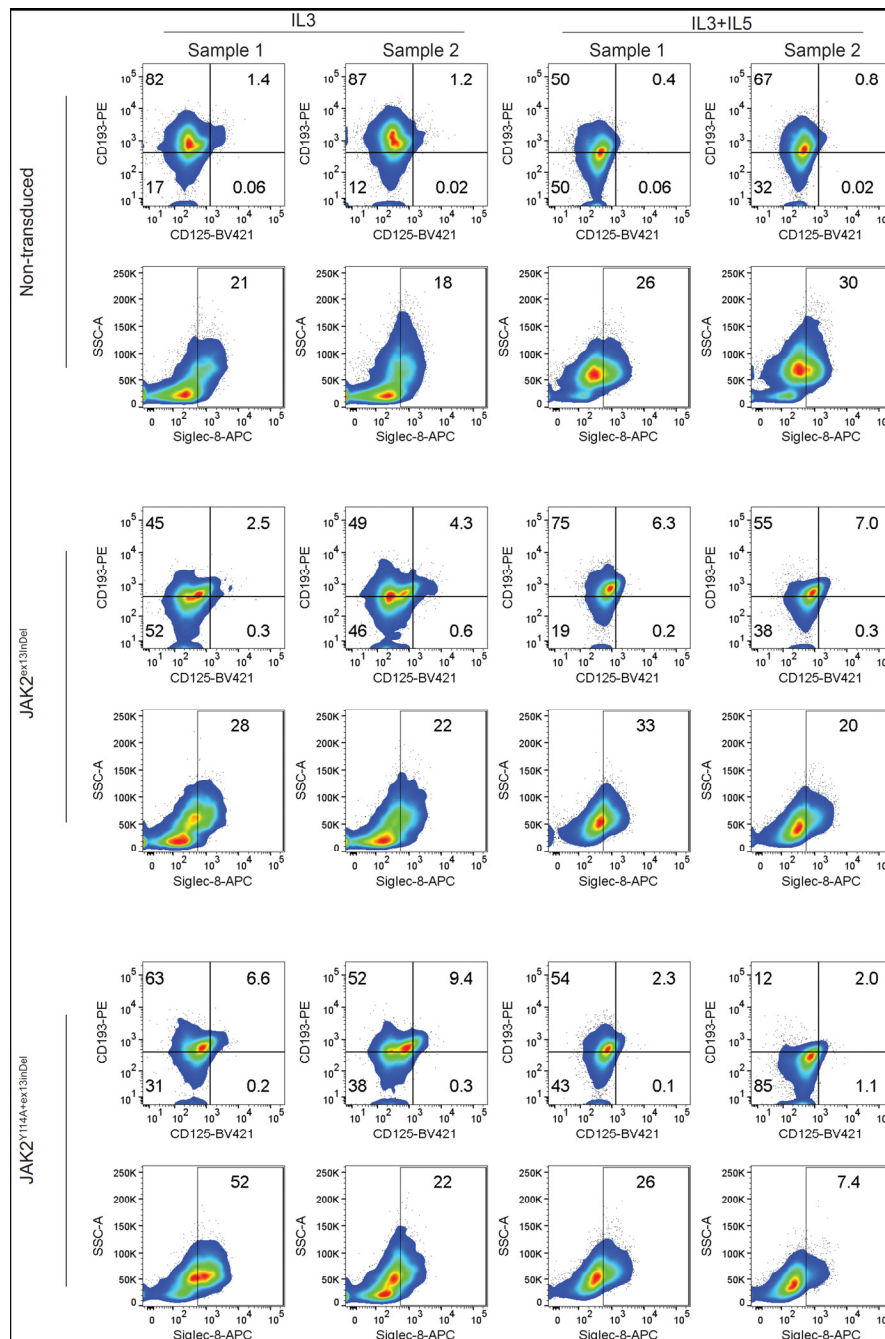

48 **Additional patient information**49 **Patient #2**

50 Local ID: E12556 (W1617130)

51 Mutation: NM\_004972:c.1748\_1757delinsA, p.(Leu583\_Ala586delinsGln)

52 VAF: 16.7% (peripheral blood)

53 Absent in cultured T-cells

54 Myeloid panel analysis (Illumina TruSight Myeloid Panel):

55

56 Gene: DNMT3A

57 Transcript: NM\_175629.2

58 Nucleotide Change: c.1728delT

59 Protein Change: p.(Lys577Argfs\*74)

60 VAF: 32%

61 Total Depth: 1842

62

63 An 82 year old female was referred by her primary provider for persistent eosinophilia which had been present  
 64 for at least the past 5 years. She had a past medical history of hypertension for which she was taking amlodipine,  
 65 and a total hip replacement. She had no history of allergy, tropical travel, inflammatory or autoimmune conditions.  
 66 She denied any cardiorespiratory or gastrointestinal symptoms and had no history of rashes.

67 Clinical examination was entirely unremarkable. Her CBC was as follows (normal ranges, normal range are in  
 68 parenthesis):

69 Hemoglobin 13 g/dL (12-15)

70 WBC  $11.7 \times 10^9/L$  (4-10)71 Platelets  $214 \times 10^9/L$  (150-400)72 Neutrophils  $5.28 \times 10^9/L$  (2-7)73 Lymphocytes  $1.87 \times 10^9/L$  (1-3)74 Eosinophils  $3.87 \times 10^9/L$  (0.02-0.5)75 Monocytes  $0.64 \times 10^9/L$  (0.2-1.0)76 Basophils  $0.04 \times 10^9/L$  (0.02-0.1)

77

78 The blood film showed mature eosinophils with no left shift. The renal and liver function were normal as was the  
 79 serum LDH and tryptase (8 mcg/L, NR 2-14). A bone marrow aspirate was hypercellular with some hypolobated  
 80 megakaryocytes, normal erythropoiesis but with marked eosinophilia and eosinophilic precursors. Mast cells  
 81 appeared prominent. There was no increase in blasts. The trephine biopsy was hypercellular with a prominent

82 eosinophil population and grade 1/3 reticulin staining. The marrow was negative for BCR-ABL transcripts and  
83 KITD816V. FISH was negative for PDGFR a-FIP1L1. Cytogenetics were normal.

84  
85 Further investigations for eosinophilia related end-organ damage included a chest X-ray (normal). During  
86 additional work-up, she presented to the Emergency Department with acute confusion and drowsiness on a  
87 background of several months history of decline in upper limb coordination and word finding difficulties. She had  
88 an extrapyramidal type tremor and was found to be bradykinetic with bilateral upper limb increased tone and  
89 ataxia. A MRI brain did not highlight any acute changes but there were chronic white matter ischemic changes  
90 and an old infarct in the cerebellum. A diagnosis of likely cortical basal degeneration was made and she was  
91 commenced on Co-careldopa. Over the ensuing three months, she continued to deteriorate neurologically and  
92 passed away.

### 94 **Patient #3**

95 Local ID: E13502

96 Mutation: NM\_004972:c.1747\_1756delinsT (p.Leu583\_Ala586delinsSer)

97 VAF: 39.8% (peripheral blood)

98 Confirmed in second blood sample (44.0% VAF)

99 Absent in cultured T-cells

100 No additional mutations by myeloid panel analysis

101  
102 This 30-year old man consulted his family doctor in October 2017 with a 3-month history of intermittent visual  
103 disturbances. His CBC showed erythrocytosis and eosinophilia (Hb 18.7 g/dL, Hct 57 %, WBC 22.1 x 10<sup>9</sup>/L,  
104 neutrophils 2.2 x 10<sup>9</sup>/L, eosinophils 15.7 x 10<sup>9</sup>/L). He had no other symptoms, no history of exotic travel, and  
105 was a non-smoker. His spleen was just palpable but examination was otherwise unremarkable. He was first seen  
106 by Hematology in January 2018, and his CBC (shown below) demonstrated erythrocytosis, eosinophilia and  
107 neutrophilia, confirmed on blood film. His liver and renal function, serum tryptase and inflammatory markers were  
108 normal and routine auto-antibodies were negative. His serum erythropoietin was markedly suppressed (1.4 IU/L,  
109 NR 5.0-25.0 IU/L). Strongyloides serology was negative as was fecal microscopy for ova, cysts and parasites.  
110 MR imaging of his head was normal and whole-body FDG PET-CT imaging demonstrated mild, non-avid  
111 splenomegaly (14 cm cranio-caudally) but no FDG-avid lymphadenopathy. Lung function testing and  
112 echocardiography were normal.

113 Peripheral blood testing for *JAK2* V617F (by RT-PCR), *JAK2* exon 12 mutations (by high resolution melt curve  
114 assay), FIP1L1-PDGFR (by RT-PCR) and *KIT* D816V (by RT-PCR) was negative. The bone marrow aspirate  
115 was non-diagnostic but the trephine was hypercellular and showed disordered erythropoiesis, with dysplastic

116 and megaloblastic changes. The myeloid series was left-shifted and note was made of increased eosinophils  
117 and their precursors, as well as a few spindle-shaped mast cells. Reticulin was normal.

118 A diagnosis of polycythemia vera with eosinophilia was made, and the patient initially underwent fortnightly  
119 phlebotomies, then commenced on pegylated interferon. His hemoglobin had fallen but his eosinophil count  
120 remained elevated. He remained systemically well but continued to have very occasional visual disturbances for  
121 which he was under investigation by neurology.

## 123 **Supplemental Methods**

124 **Fluorescence activated cell sorting of primary cells.** Leukocytes from Patient 1 were incubated with  
125 fluorescent labeled antibodies [APC anti-human Siglec-8 (Biolegend, Cat #347106 clone 7C9) and PE/Cy7  
126 anti-human CD16 (BD Pharmingen Cat# 557744 clone 3G8)], washed and sorted on a FACSARIA (BD  
127 Biosciences, San Jose, CA) as follows: eosinophils (CD16-, Siglec-8 +, high side scatter), neutrophils (CD16+,  
128 Siglec-8-, high side scatter, lymphocytes (CD16-, Siglec-8-, low side scatter).

129 **Expression plasmids.** MSCV-IRES-GFP (MIG2) empty vector was purchased from Addgene (a gift from  
130 Tannishtha Reya, Addgene plasmid # 20672 ; <http://n2t.net/addgene:20672> ; RRID:Addgene\_20672). First, we  
131 inserted two unique cutting sites (MluI and SacII) within the MCS of MIG2 using synthesized oligos between  
132 EcoRI and XhoI sites. Full length WT-hJAK2 and V617F-hJAK2 were amplified by PCR. The Leu583-  
133 Ala586DelInsSer mutation was introduced by PCR-driven overlap extension. All PCR fragments were digested  
134 with MluI/SacII, column purified, ligated in the MluI/SacII digested MIG2-vector and transformed in chemically  
135 competent Stb13 E. coli (Invitrogen). The E596R mutation was introduced by PCR-driven overlap extension using  
136 previously generated plasmids as template. The PCR for this step was designed to amplify a 1639-bp (1630-bp  
137 for InDel) region between EcoRI and BamHI sites. All PCR products were digested with BsiWI, BamHI and XcmI,  
138 gel purified and ligated in BsiWI/BamHI digested vector. The FERM domain mutation Y114A was introduced via  
139 homology driven PCR and the produced fragment was ligated into MIG2-hJAK2InDel vector using MluI and  
140 BsiWI restriction sites. All plasmids produced were verified by Sanger sequencing (see below).

141 **Mutagenesis.** Site-directed mutagenesis was completed by the overlapping-extension PCR amplification  
142 method using primers containing the desired mutations (see below). The reaction was performed using 1  $\mu$ L of  
143 PfuTurbo DNA polymerase 2.5 U/ $\mu$ L following the manufacturer's protocol. The coding region of each construct  
144 was verified by Sanger sequencing. The three JAK2 constructs were cloned in the bicistronic retroviral vector  
145 pMX-IRES-GFP1, and verified by Sanger sequencing.

146 **Generation of Ba/F3 lines.** 293T cells grown in DMEM supplemented with 10% FBS were seeded in 6-well  
147 plates at  $6.5 \times 10^5$  cells/well 24 hours before transfection. For generation of pseudoviral particles, cells were co-  
148 transfected with packaging vector (2  $\mu$ g EcoPak) and MIG2-JAK2<sup>WT</sup> and all variant plasmids (2  $\mu$ g), respectively

149 in Opti-MEM using Lipofectamine 2000 and Plus Reagent. Six hours after transfection, cell culture media was  
150 replaced with DMEM supplemented with 10% FBS and 1% BSA. Viral supernatant was harvested 72 hours after  
151 transfection, filtered (0.45  $\mu$ m) and used for transduction without additional processing. Parental Ba/F3 cells were  
152 transduced with the human JAK2 retroviral constructs and sorted for GFP positivity after infection.

153 **Immunoblot and immunoprecipitation.** Parental and JAK2-containing Ba/F3 cells were washed three times in  
154 RPMI, cultured  $\pm$  10% WEHI CM and harvested for immunoblot after 4 hours. Cell pellets were washed once  
155 with cold PBS, then lysed in radioimmunoprecipitation assay (RIPA) buffer (Cell Signaling Technology, 20 mM  
156 Tris-HCl (pH 7.5), 150 mM NaCl, 1 mM Na<sub>2</sub>EDTA, 1 mM EGTA, 1% NP-40, 1% sodium deoxycholate, 2.5 mM  
157 sodium pyrophosphate, 1 mM beta-glycerophosphate, 1 mM Na<sub>3</sub>VO<sub>4</sub>, 1  $\mu$ g/mL leupeptin; with 1 mM PMSF  
158 added immediately before use). Equal amounts of protein were separated by SDS-PAGE (Bio-Rad) and  
159 transferred to nitrocellulose membrane. Antibodies used:  $\beta$ -actin, anti-ERK1/2, anti-pERK1/2, anti-p38, anti-  
160 pp38, anti-JAK2, anti-pTyr, anti-SHP2, anti-pSHP2, anti-pSTAT5<sup>Y694</sup> (all from Cell Signaling Technology,  
161 Danvers, MA), and anti-STAT5 (BD Biosciences, San Jose, CA). Images were obtained using Licor Odyssey  
162 CLx Infrared Imaging System. For immunoprecipitation, cell lysis was performed with Triton-XP 100 lysis buffer  
163 containing proteinase inhibitor (cOmplete™), phosphatase inhibitor (PhosSTOP™) and PMSF. Protein A/G  
164 beads (Thermo Fisher, Waltham, MA) were incubated with cell lysates and antibodies at 4 °C overnight and  
165 protein was eluted with sample buffer prior to gel loading.

166 **EEC colony assay.** Erythroid colonies (BFU-E) were grown from peripheral blood mononuclear cells without  
167 EPO and in the presence of EPO at 15 mU, 30 mU, 60 mU and 3 U/mL<sup>2,3</sup>. Individual BFU-Es were harvested  
168 and RNA was isolated for the transcription-based clonality assay. gDNA was genotyped for the presence of  
169 JAK2InDel and JAK3R925S<sup>1-3</sup>.

170 **Dual-luciferase reporter assay.** STAT5 transcriptional activity was measured in HEK293 cells by dual-  
171 luciferase reporter assays with the luciferase-based STAT5 reporter gene Spi\_Luc<sup>26</sup>. Cells were transfected  
172 with cytokine receptors ( $\beta$ c plus IL-3R $\alpha$ , IL-5R $\alpha$  or GM-CSFR $\alpha$ ; EPOR; MPL), JAK2, Spi\_Luc, pRL-TK (*Renilla*  
173 luciferase-expressing plasmid used as internal control) and reporter genes (Firefly luciferase-expressing  
174 plasmid) as indicated using Lipofectamine™ 2000 (Invitrogen) in Optimem. Standard protocol was followed as  
175 previously described<sup>27</sup>. Opti-MEM medium was removed 4 h after transfection and replaced by DMEM medium  
176 supplemented with 10 % FBS  $\pm$  cytokines. Cells were lysed 24 hours after transfection. Luciferase activity was  
177 measured with the Dual-Luciferase Reporter Assay System kit (Promega, Madison, WI) following  
178 manufacturer's instructions. Emitted light was recorded on a luminescence microplate reader (Perkin-Elmer,  
179 Norwalk, CT). Assay results are expressed in relative light units, (average of firefly activity divided by average  
180 of *Renilla* luciferase activity). Assays were performed in triplicate.

181 **Primary cell colony assay.** Equal numbers of patient-derived mononuclear cells were plated in duplicate in  
182 MethoCult H4435 (StemCell Technologies). Colonies were typed and counted after 10 days.



183 **Cord blood eosinophil differentiation.** Human CD34<sup>+</sup> cells were purified with an AutoMacs Pro Cell  
 184 Separator (Miltenyi Biotech, Bergisch Gladbach, Germany). Umbilical cord blood was purchased from the St.  
 185 Louis Cord Blood Bank, now part of the University of Colorado (Denver). Whole cord blood was treated to lyse  
 186 red blood cells and mononuclear cells were purified with Ficoll-Paque Premium (1.078 g/mL, GE Healthcare,  
 187 Chicago, IL). For the first 3 days cells were cultured in serum free StemSpan™ SFEM II (Stemcell  
 188 technologies, Seattle, WA) supplemented with 1% penicillin-streptomycin and SCF (50 ng/mL), FLT-3 ligand  
 189 (50 ng/mL), GM-CSF (0.1 nM), IL-3 (0.1 nM) and IL-5 (0.1 nM). Cells were transduced with lentivirus  
 190 generated using pCDH-CMV-JAK2<sup>ex13InDel</sup>-EF1 $\alpha$ -EGFP or pCDH-CMV-JAK2<sup>Y114A+ex13InDel</sup>-EF1 $\alpha$ -EGFP  
 191 plasmids and sorted for GFP at 48h after infection on a FACSAria (BD Biosciences, San Jose, CA). After  
 192 sorting, the cells were cultured with IL-3 or IL-3+IL5. A non-transduced population was also maintained under  
 193 the same condition. Culture medium was changed every 3 days and the culture was maintained for 21 days.

194

195 Primers for JAK2 expression plasmids:

196 hJAK2-MluI-For: 5'-GATTCACGCGTATGGGAATGGCCTGCCTTAC-3',

197 hJAK2-SacII-Rev: 5'-CTCGAGCCGCGGTCATCCAGCCATGTTATCCCTTATT-3',

198 hJAK2-InDel-Rev: 5' TTCTGTGTGAACTTTTAAAAGAACTTCTGTTTCATGCAGTTGA-3',

199 hJAK2-InDel-For: 5'-TCAACTGCATGAAACAGAAGTTCTTTTAAAAGTTTCACACAGAA-3',

200 hJAK2-EcoRI-For: 5'-ACGGTGGAAATTCAGTGGTCAAGA-3',

201 hJAK2-E596R-For: 5'-TCAGAGTCTTTCTTTAGGGCAGCAAGTATGAT-3',

202 hJAK2-E596R-Rev: 5'-ATCATACTTGCTGCCCTAAAGAAAGACTCTGA-3',

203 hJAK2-BamH1-Rev: 5'-ACTGTGTAGGATCCCGGTCTTCA-3'.

204 hJAK2-Y114A-Rev: 5'-GAGGAAAGTAAAATCTTATTCTTGCGAGTACATTATGCCTGGTTGACTCA-3'

205 hJAK2-Y114A-For: 5'-TGAGTCAACCAGGCATAATGTACTIONGCAAGAATAAGATTTTACTTTTCTC-3'

206 hJAK2-BsiWI-Rev: 5'-CTCCTACTTCTCTTCGTACGCCTTTAAA-3'

207

208 Additional primers for sequencing were:

209 hJAK2-600-For, 5'-CTATAACTCTATCAGCTACAAGACATTCTT-3',

210 hJAK2-1400-For, 5'-ACAAAGAAGAACTTCAGCAGTCT-3',

211 hJAK2-2256-For, 5'-ACCTCTAAGTGCTCTGGATTCTCAAAG-3',

hJAK2-3000-For, 5'-CTTGCCACAAGACAAAGAATACT-3'.

Gag-For, 5'-ATCCTCCCTTTATCCAGCCCTC-3'.

IRES-Rev, 5'-GCCCTCACATTGCCAAAAGACGG-3'.

### ***Analysis of samples from the University of Southampton***

Genotyping of JAK2 exon 13. 173 samples from patients with FIP1L1-PDGFRA negative eosinophilia referred to Wessex Regional Genetics Laboratory for FIP1L1-PDGFRA fusion testing were retrospectively screened for JAK2 exon 13 mutations. Primers covering JAK2 exon 13 (Table A) were designed for custom targeted amplicon NGS. Primers were tested using qPCR and Bioanalyzer to confirm performance and specificity. Indexed JAK2 exon 13 amplicons were generated using 60 ng of patient DNA per reaction, and purified using AmpureXP beads. Amplicons were pooled to generate final sequencing libraries consisting of ~40 patients. Libraries were assessed using Bioanalyzer and Qubit. Sequencing runs were performed on the Illumina MiSeq platform using Nano v2 2x250 reagents. VCF files were generated using the WRGL in-house genotyping pipeline, and were annotated using web-based bioinformatics tools Galaxy, ANNOVAR and Ensembl VEP. Confirmation of JAK2 exon 13 InDels detected by NGS was performed by fragment analysis and Sanger sequencing (primer sequences below).

F\_01 and R\_01 were used in amplicon library generation.

JAK2\_13\_F\_01 GTATTTTCTTGTTCTACTTCGTTTC

JAK2\_13\_R\_01 TTTAAACAGCATAAACTACATGAACA

F\_02 and R\_02 were used for Sanger sequencing.

JAK2\_13\_F\_02 TGTTCTACTTCGTTCTCCATCT

JAK2\_13\_R\_02 AGCACATCTTTAAACAGCATAAACT

F\_03 and R\_02 used for fragment analysis.

JAK2\_13\_F\_03 [6FAM]-ACGGTCAACTGCATGAAACA

### **SUPPLEMENTAL REFERENCES:**

1. Liu X, Constantinescu SN, Sun Y, et al: Generation of mammalian cells stably expressing multiple genes at predetermined levels. *Anal Biochem* 280:20-8, 2000
2. Kralovics R, Stockton DW, Prchal JT: Clonal hematopoiesis in familial polycythemia vera suggests the involvement of multiple mutational events in the early pathogenesis of the disease. *Blood* 102:3793-6, 2003
3. Nussenzveig RH, Swierczek SI, Jelinek J, et al: Polycythemia vera is not initiated by JAK2V617F mutation. *Exp Hematol* 35:32-8, 2007



**Supplemental Table 1.** Percentage of Ba/F3 GFP-positive cells 48 hours following transduction.

| <b>Genotype / Experiment #</b> | <b>Experiment 1</b> | <b>Experiment 2</b> | <b>Experiment 3</b> |
|--------------------------------|---------------------|---------------------|---------------------|
| Ba/F3 hJAK2 WT                 | 1.38                | 2.82                | 4                   |
| Ba/F3 hJAK2 V617F              | 2.79                | 3                   | 6                   |
| Ba/F3 hJAK2 ex13InDel          | 2.38                | 3.1                 | 3                   |

**Supplemental Table 2.** Complete blood count data for Patient 3.

| <b>Parameter / Date</b>               | <b>April 2018</b> | <b>February 2018</b> | <b>January 2018</b> |
|---------------------------------------|-------------------|----------------------|---------------------|
| Hemoglobin (g/dL)                     | 16                | 18.2*                | 18.4*               |
| HCT %                                 | 50.1%*            | 55.1%*               | 56.7%*              |
| Platelet count x 10 <sup>9</sup> /L   | 305               | 255                  | 283                 |
| White cell count x 10 <sup>9</sup> /L | 19.70*            | 22.58*               | 24.64*              |
| Basophils x 10 <sup>9</sup> /L        | 0.06              | 0.07                 | 0.12*               |
| Eosinophils x 10 <sup>9</sup> /L      | 7.96*             | 14.27*               | 5.69*               |
| Lymphocytes x 10 <sup>9</sup> /L      | 3.15              | 3.16                 | 3.45                |
| Monocytes x 10 <sup>9</sup> /L        | 0.59              | 0.61                 | 0.71                |
| Neutrophils x 10 <sup>9</sup> /L      | 7.94*             | 4.47                 | 14.66*              |

(\* indicates above normal range)
